# Supplementary material for: The Importance of Epigallocatechin as a Scaffold for Drug Development against Flaviviruses
Source: MDPI journal article supplement (doi:10.3390/pharmaceutics15030803), 2023-03-01
Supplement: s1 [file s1]

## Supplementary Information

# The Importance of Epigallocatechin as a Scaffold for Drug Development against Flaviviruses

Mônika A. Coronado <sup>1,\*</sup>, Ian Gering <sup>1</sup>, Marc Sevenich <sup>1,2</sup>, Danilo S. Olivier <sup>3</sup>, Mohammadamin Mastalipour <sup>1,4</sup>, Marcos S. Amaral <sup>5</sup>, Dieter Willbold <sup>1,4,6</sup> and Raphael J. Eberle <sup>1,4,\*</sup>

<sup>1</sup> Institute of Biological Information Processing (IBI-7: Structural Biochemistry), Forschungszentrum Jülich, 52428 Jülich, Germany

<sup>2</sup> Priavoid GmbH, Merowingerplatz 1A, 40225 Düsseldorf, Germany

<sup>3</sup> Integrated Sciences Center, Campus Cimba, Federal University of Tocantins, Araguaína 77824-838, TO, Brazil

<sup>4</sup> Institut für Physikalische Biologie, Heinrich-Heine-Universität Düsseldorf, Universitätsstraße, 40225 Düsseldorf, Germany

<sup>5</sup> Institute of Physics, Federal University of Mato Grosso do Sul, Campo Grande 79070-900, MS, Brazil

<sup>6</sup> JuStruct: Jülich Centre for Structural Biology, Forschungszentrum Jülich, 52428 Jülich, Germany

\* Correspondence: m.coronado@fz-juelich.de (M.A.C.); r.eberle@fz-juelich.de (R.J.E.); Tel.: +49-2461-61-9505 (M.A.C. & R.J.E.)

### Table of contents

**Table S1.** Range of the epigallocatechin molecules concentrations.

**Figure S1.** Inhibition effect of the Epigallocatechin molecules over the NS2B/NS3 proteases.

**Figure S2.** IC<sub>50</sub> calculation of the Epigallocatechin molecules over the NS2B/NS3 proteases.

**Figure S3.** Inhibition mode of the Epigallocatechin molecules over the NS2B/NS3 proteases.

**Figure S4.** Inhibition effect of the Epigallocatechin molecules over the NS2B/NS3 proteases.

**Figure S5.** Dissociation constant (K<sub>D</sub>) determination of the epigallocatechin molecules binding to NS2B/NS3<sup>pros</sup> using surface plasmon resonance (SPR).

**Figure S6.** Ligand-induced changes in the CD spectrum of soluble NS2B/NS3 proteases.

**Figure S7.** Fluorescence spectroscopy of Trp at 295 nm of the NS2B/NS3<sup>pros</sup> and the epigallocatechin molecules.

**Figure S8.** RMSD values and RMSF profiles for the replicate 100 ns of MD simulations of NS2B/NS3 protease of DENV in complex with the epigallocatechin molecules.

**Figure S9.** RMSD values and RMSF profiles for the replicate 100 ns of MD simulations of NS2B/NS3 protease of YFV in complex with the epigallocatechin molecules.

**Figure S10.** RMSD values and RMSF profiles for the replicate 100 ns of MD simulations of NS2B/NS3 protease of WNV in complex with the epigallocatechin molecules.

**Figure S11.** RMSD values and RMSF profiles for the replicate 100 ns of MD simulations of NS2B/NS3 protease of ZIKV in complex with the epigallocatechin molecules.

**Figure S12.** Numbers of H-bonds between the epigallocatechins and NS2B/NS3<sup>pro</sup> residues during the 100 ns MD simulations.

**Table S1.** Range of the epigallocatechin molecules concentrations.

| Epigallocatechin molecules concentration (μM) |     |      |        |
|-----------------------------------------------|-----|------|--------|
|                                               | EGC | EGCG | AcEGCG |

|              |                                     |                                   |                                             |
|--------------|-------------------------------------|-----------------------------------|---------------------------------------------|
| <b>DENV2</b> | 1.31; 1.97; 2.96; 4.44              | 0.58; 0.88; 1.32; 1.97            | 1.95; 2.9; 4.38; 9.87; 14.81                |
| <b>YFV</b>   | 1.75; 2.63; 3.95; 5.92; 8.88; 13.33 | 0.39; 0.58; 1.31; 1.97; 2.9; 4.44 | 1.97; 2.9; 4.44; 6.66; 10                   |
| <b>WNV</b>   | 1.56; 3.12; 6.25; 12.5              | 1.3; 1.95; 2.9; 4.38; 6.5         | 4.38; 6.5; 9.9; 14.81; 22.2                 |
| <b>ZIKV</b>  | 4; 8; 16; 32; 64                    | 0.58; 0.88; 1.32; 1.97            | 2.92; 4.39; 6.58; 9.87; 14.81; 22.22; 33.33 |

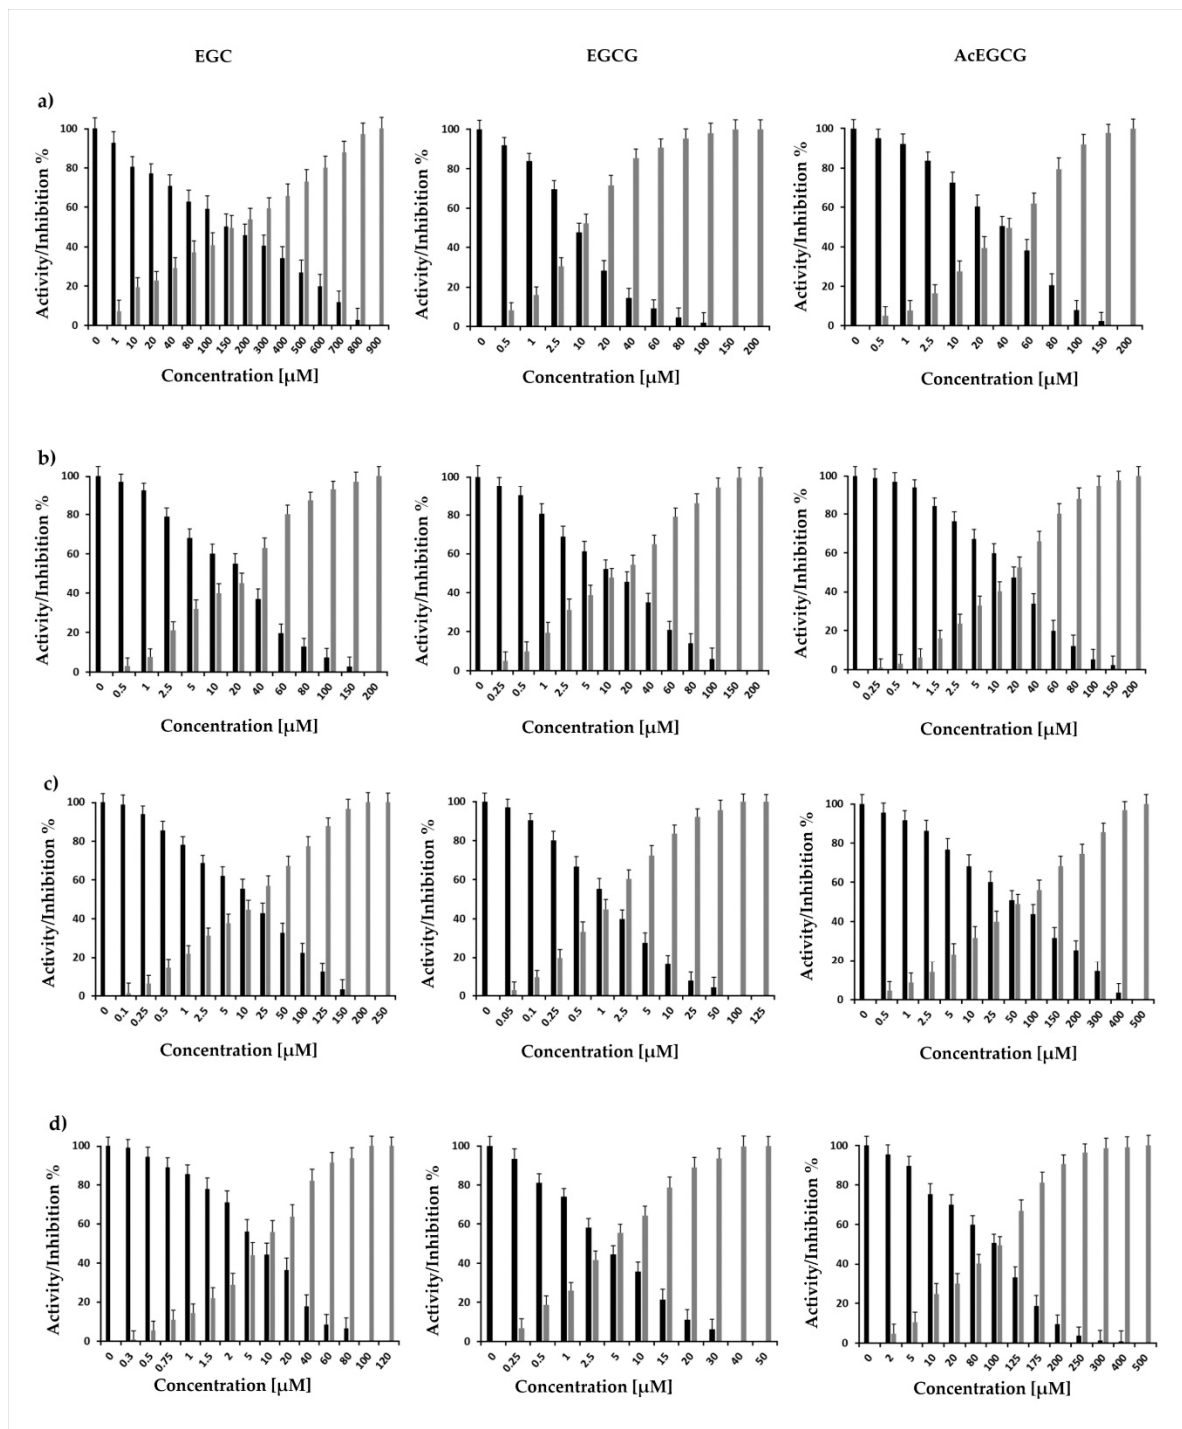

**Figure S1.** Inhibition effect of the Epigallocatechin molecules over the NS2B/NS3 proteases of (a) DENV, (b) YFV, (c) WNV, and (d) ZIKV. Data showed are the mean  $\pm$  SD from three independent measurements (n=3).

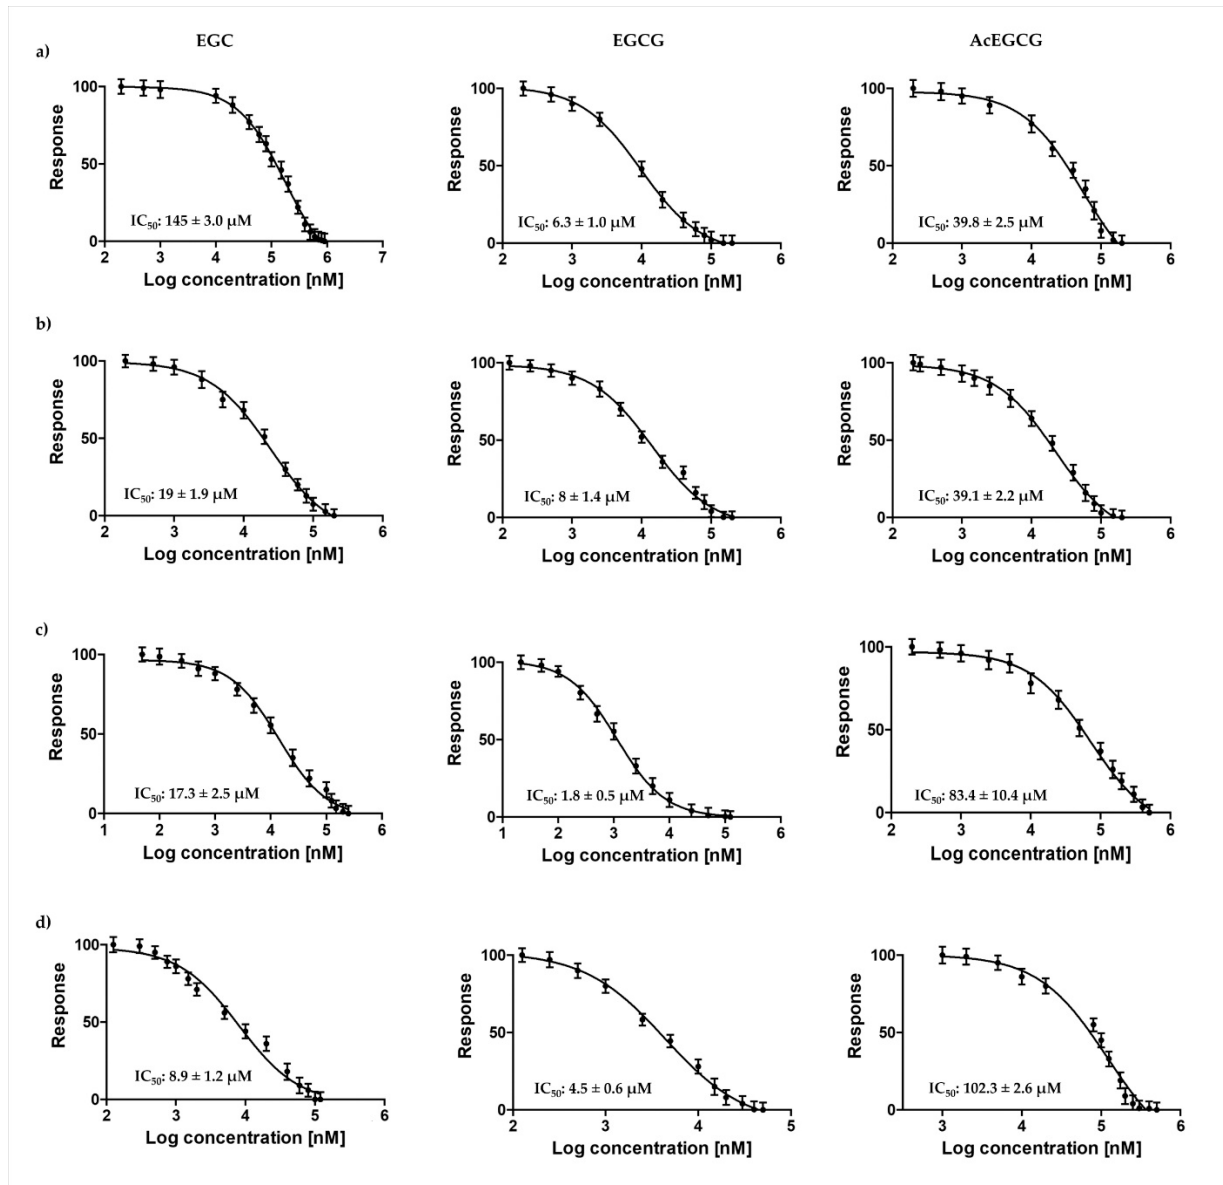

**Figure S2.** IC<sub>50</sub> calculation of the Epigallocatechin molecules over the NS2B/NS3 proteases of (a) DENV, (b) YFV, (c) WNV, and (d) ZIKV. Data showed are the mean  $\pm$  SD from three independent measurements (n=3).

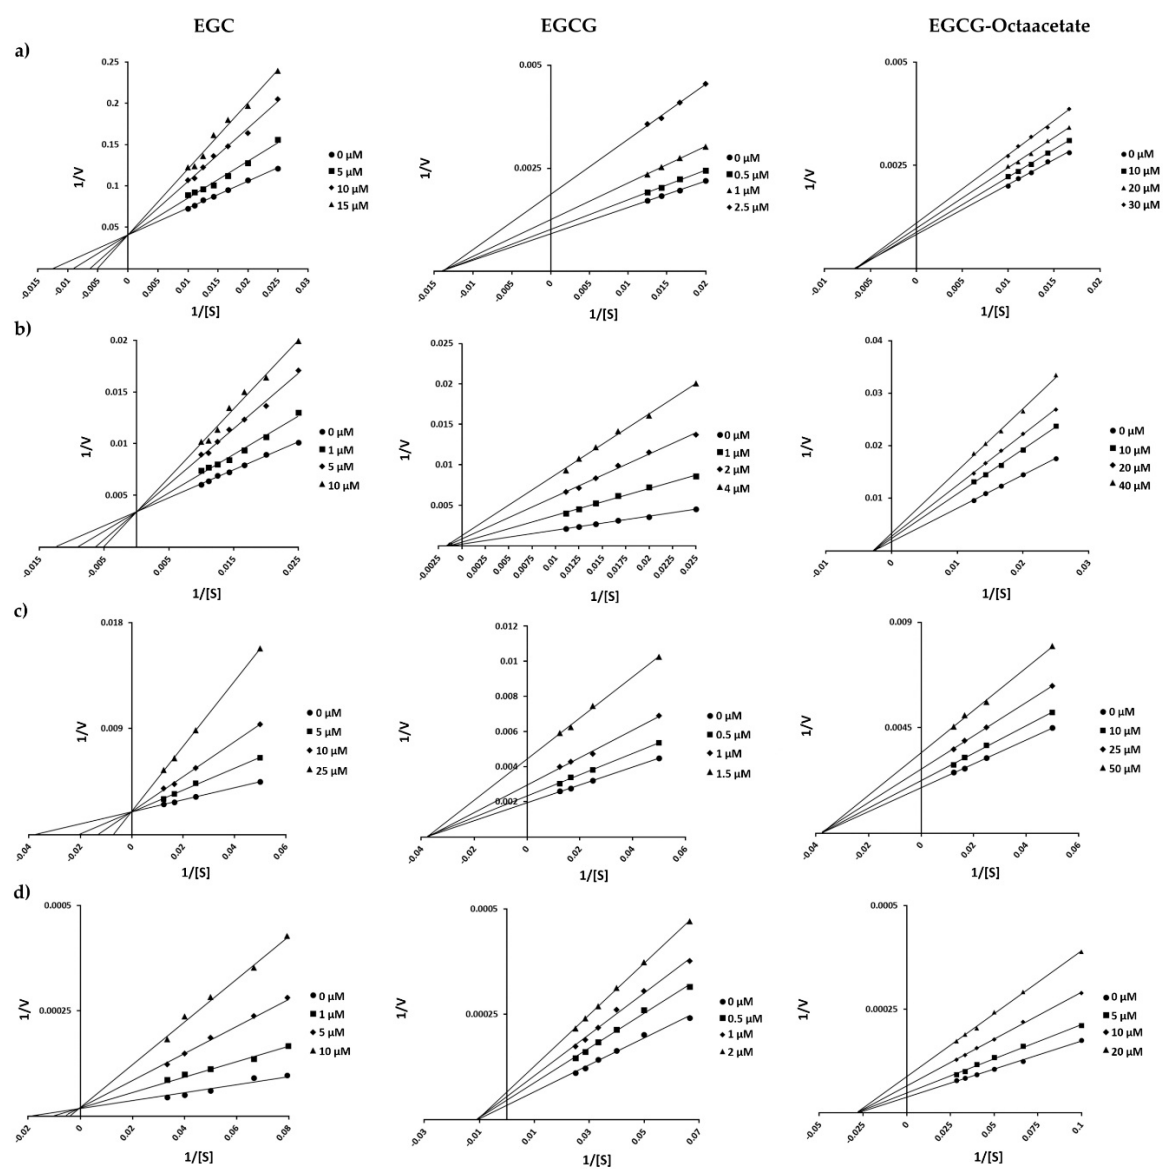

**Figure S3.** Inhibition mode of the Epigallocatechin molecules over the NS2B/NS3 proteases of (a) DENV, (b) YFV, (c) WNV, and (d) ZIKV. Data showed are the mean  $\pm$  SD from three independent measurements ( $n=3$ ).



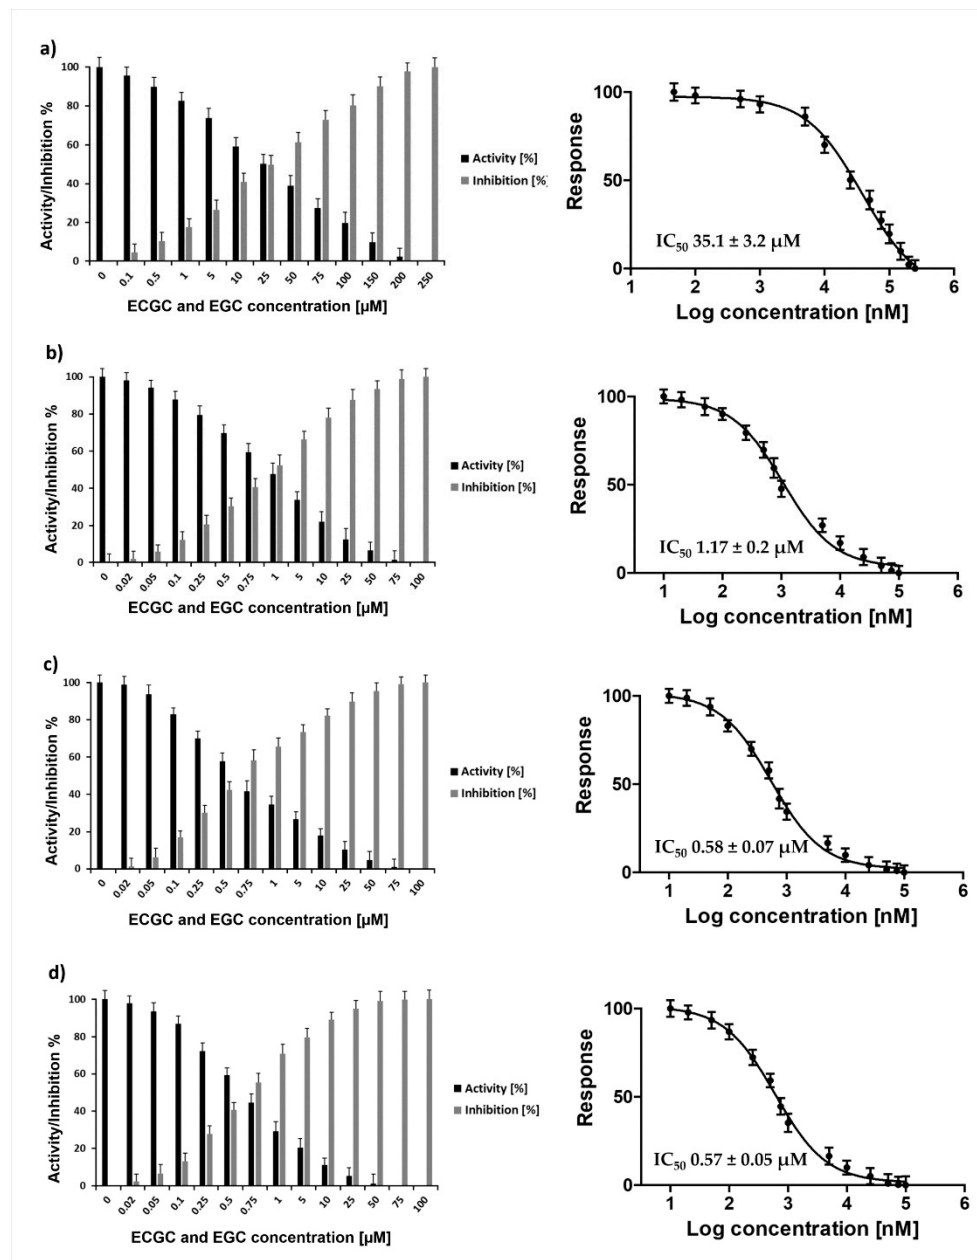

**Figure S4.** Inhibition effect of the Epigallocatechin molecules combination over the NS2B/NS3 protease of (a) DENV, (b) YFV, (c) WNV, and (d) ZIKV. Data showed are the mean  $\pm$  SD from three independent measurements ( $n=3$ ).

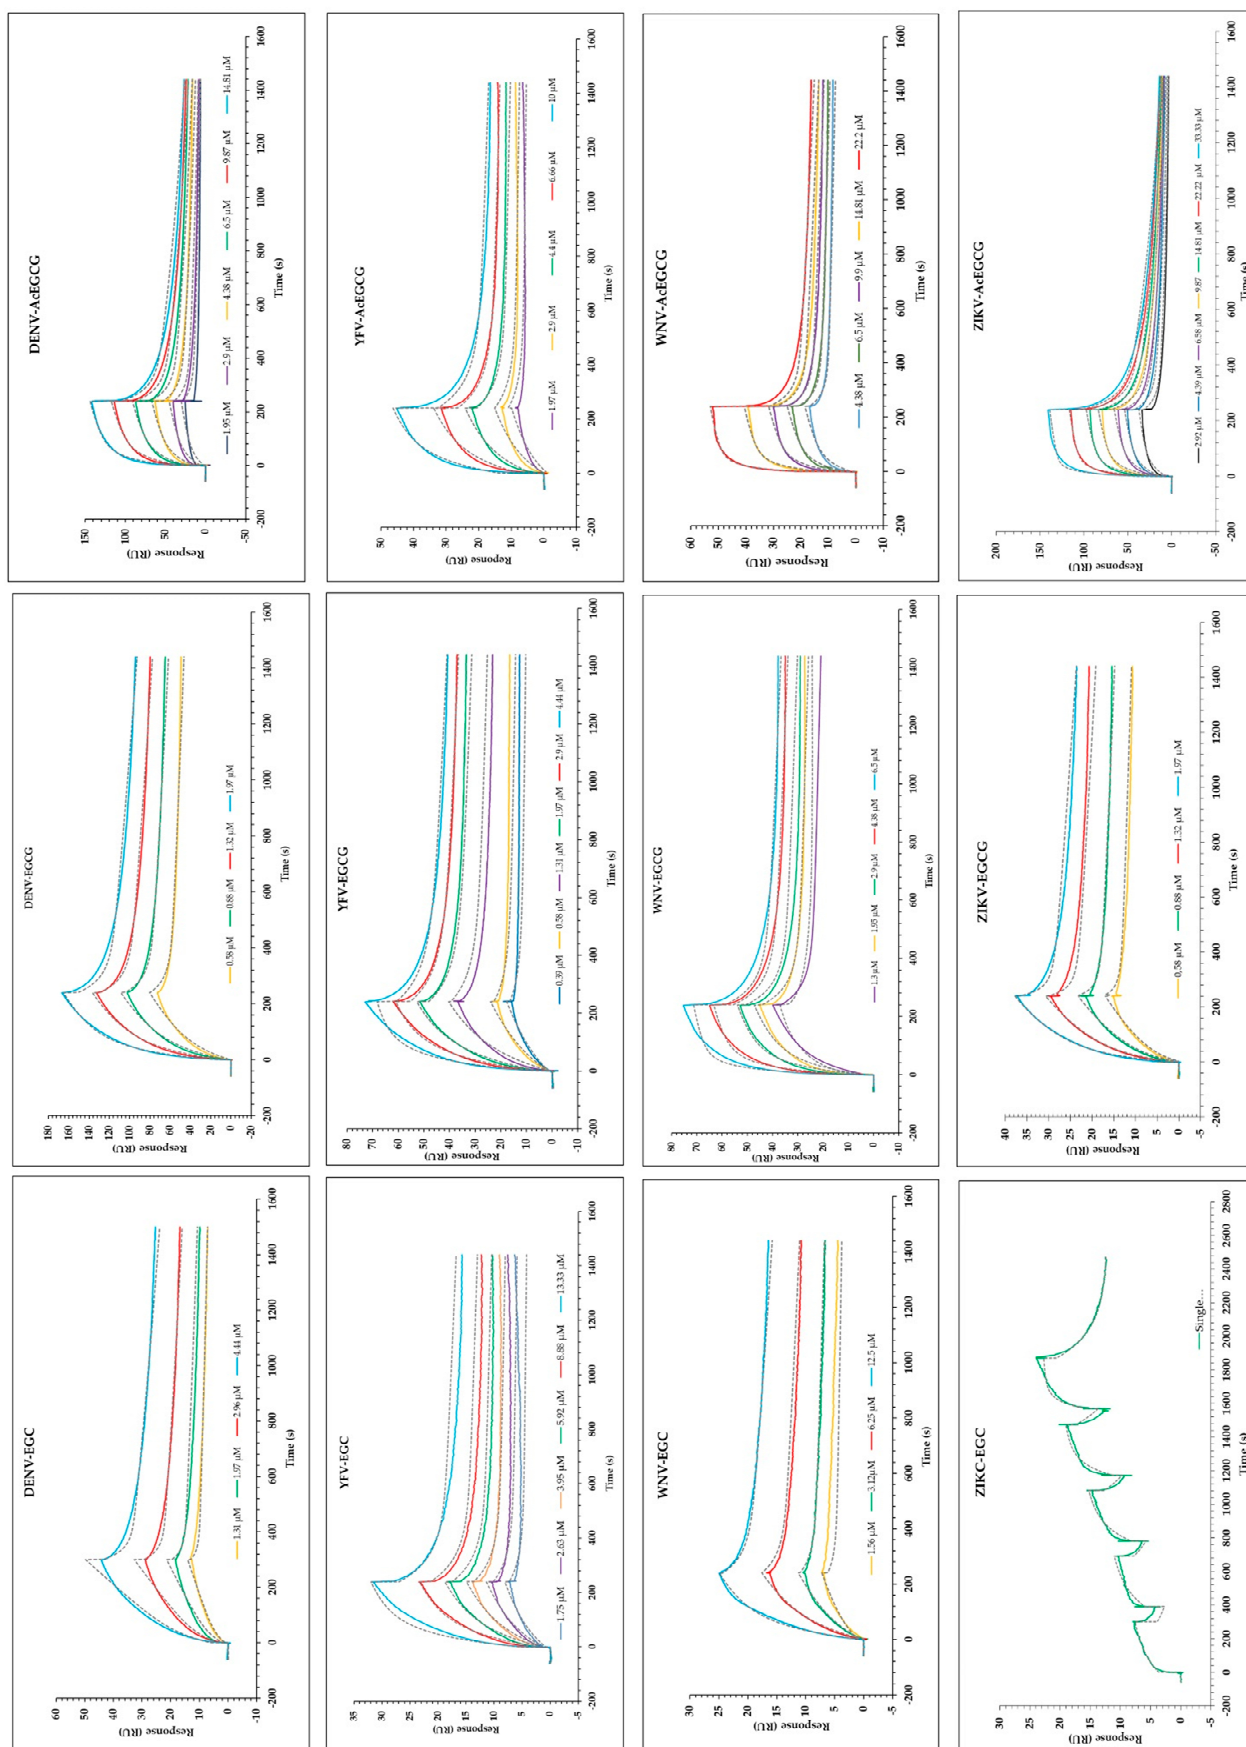

**Figure S5.** Dissociation constant (KD) determination of the epigallocatechin molecules binding to NS2B/NS3<sup>pros</sup> using surface plasmon resonance (SPR). NS2B/NS3 proteases were immobilized on CM5 sensor chip and a range of the epigallocatechin molecules concentrations (Table S1) were passed over the surface. The final sensorgram is representative of two cycles.

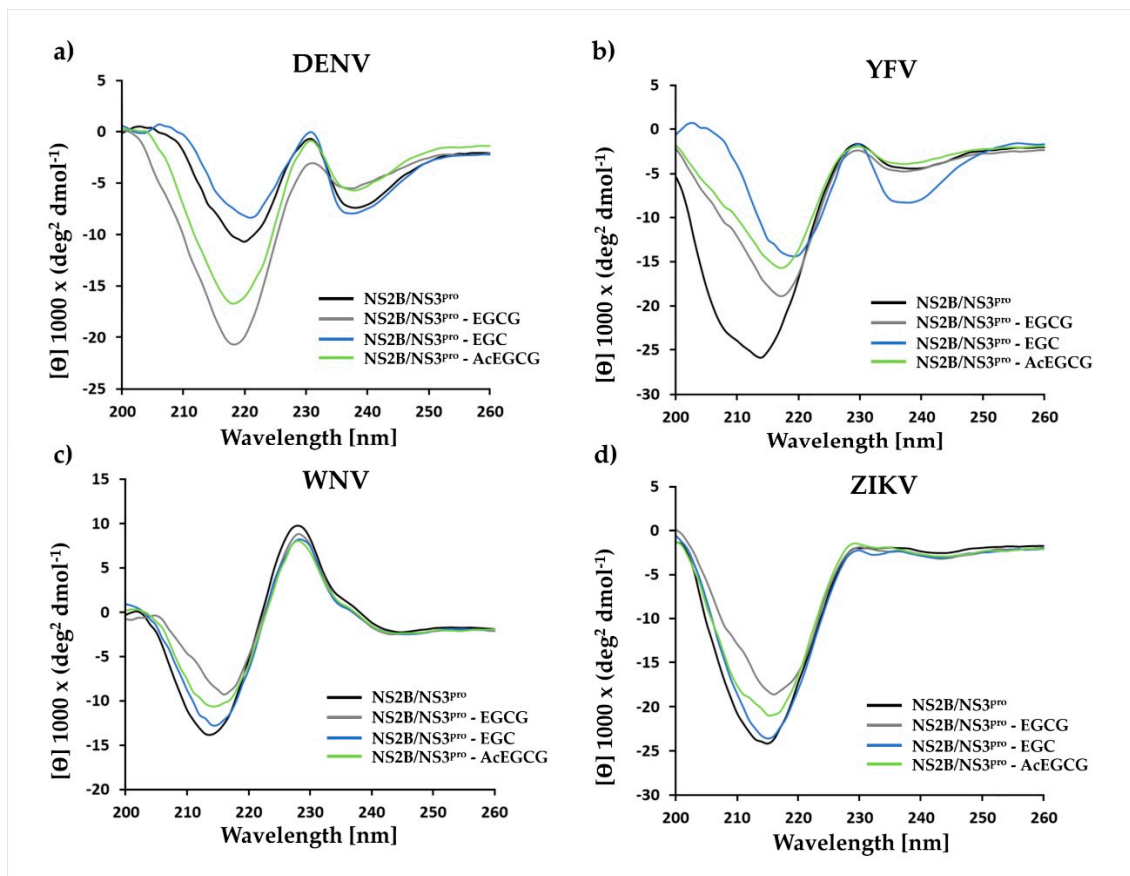

**Figure S6.** Ligand-induced changes in the CD spectrum of soluble NS2B/NS3 proteases of DENV, YFV, WNV and ZIKV in 20 mM K<sub>2</sub>HPO<sub>4</sub>/KH<sub>2</sub>PO<sub>4</sub> pH 7.5.

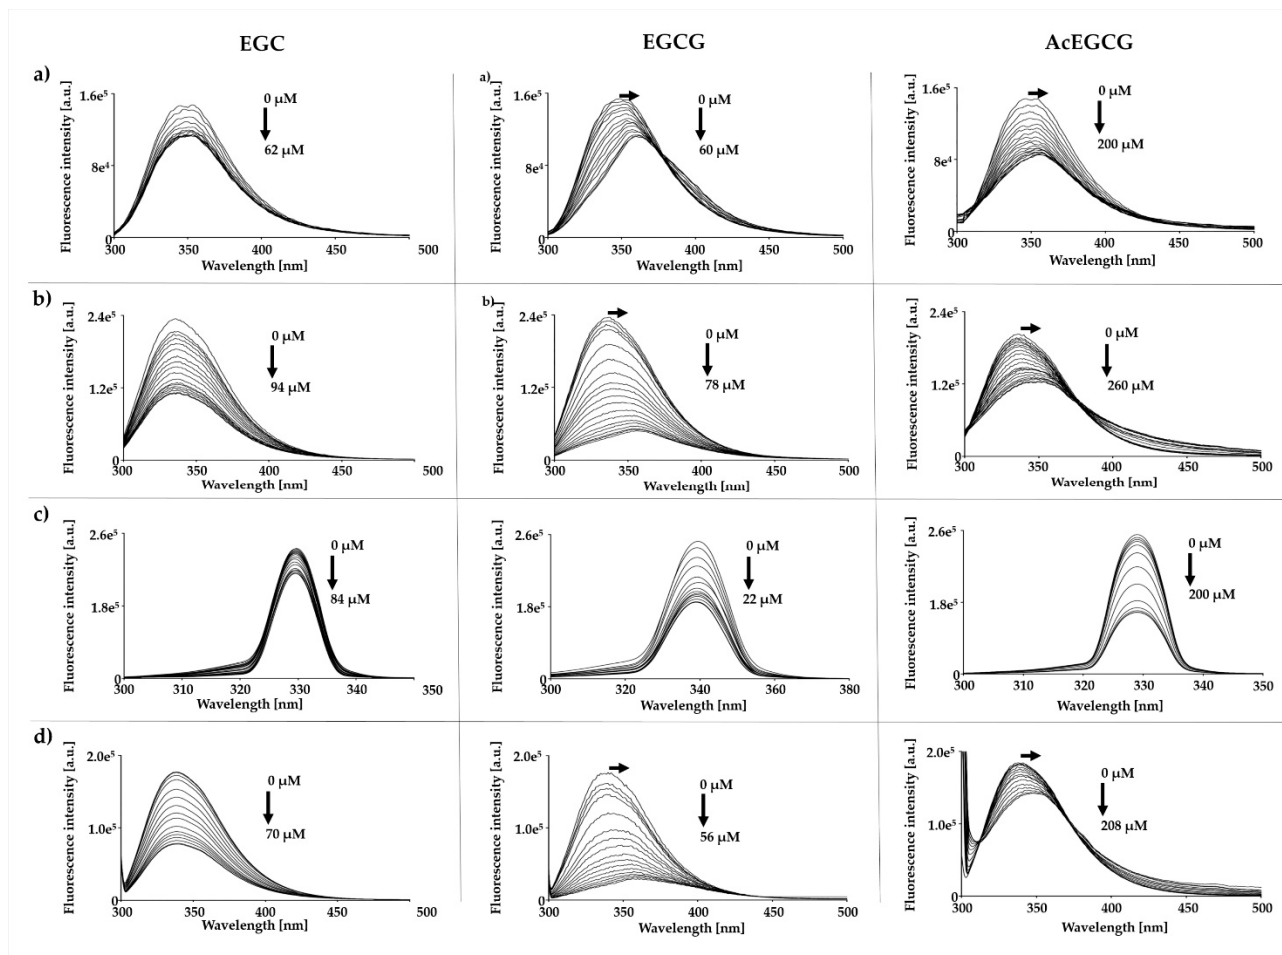

**Figure S7.** Fluorescence spectroscopy of Trp at 295 nm of the NS2B/NS3pros and the epigallocatechin molecules. a) DENV, (b) YFV), (c) WNV, and (d) ZIKV.

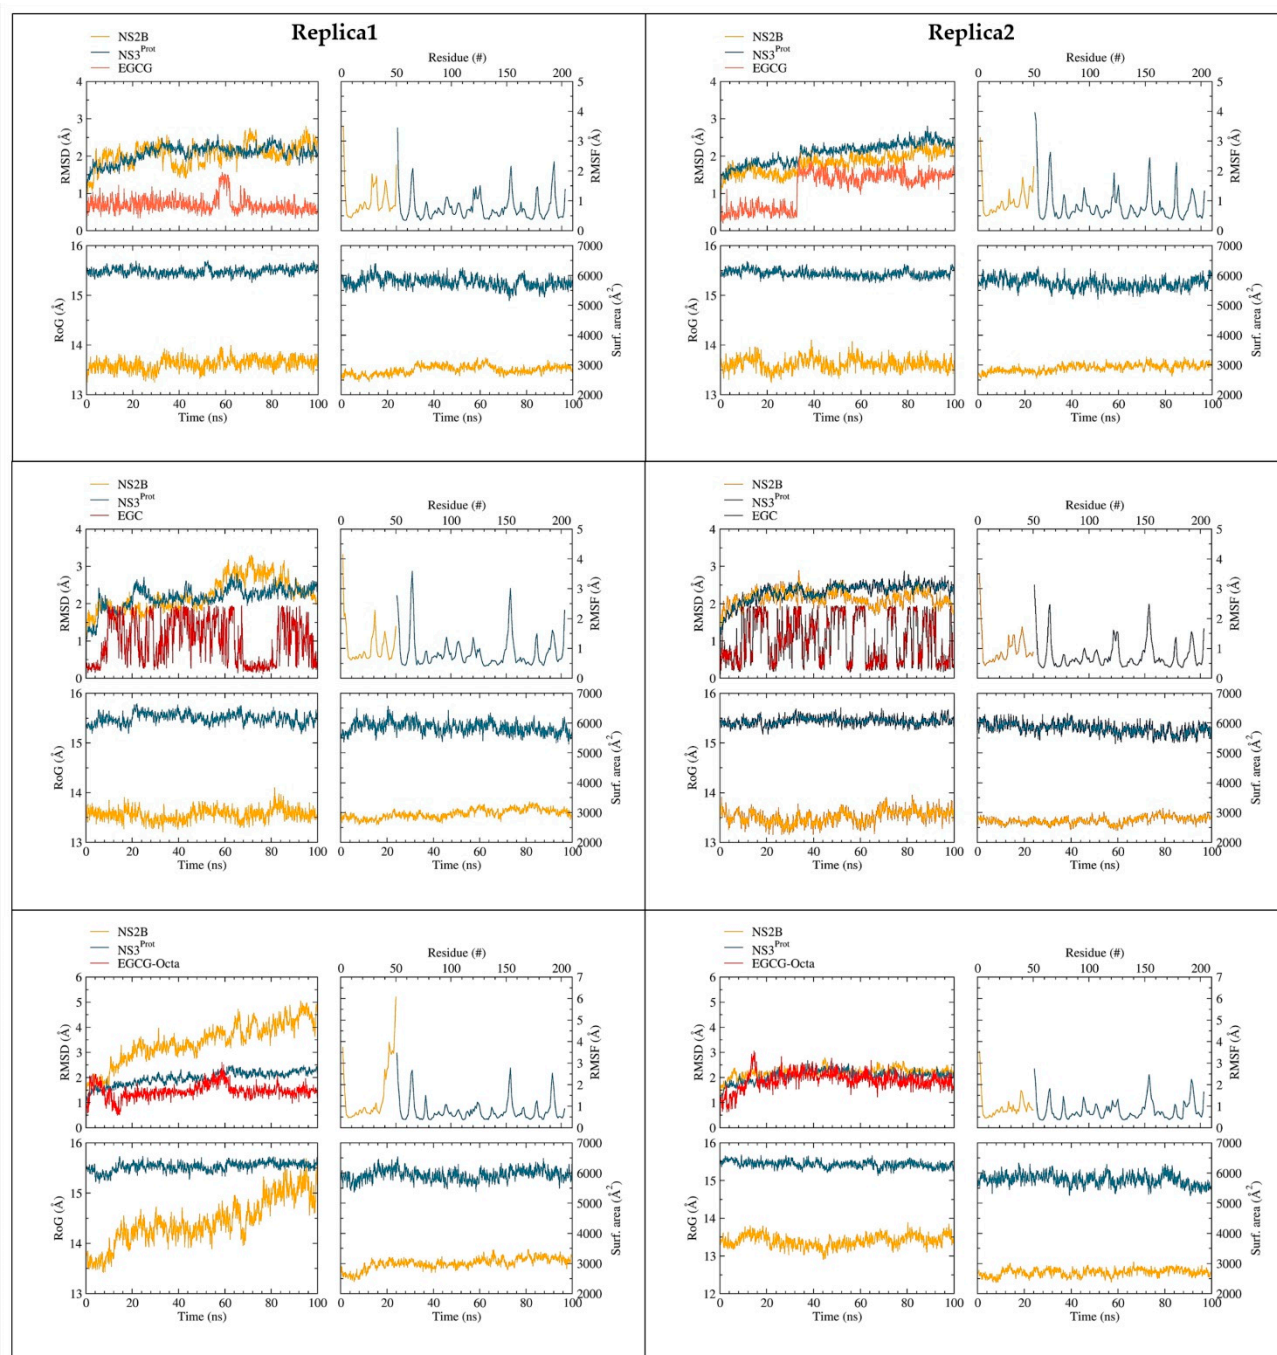

**Figure S8** RMSD values and RMSF profiles for the replicate 100 ns of MD simulations of NS2B/NS3 protease of DENV in complex with the epigallocatechin molecules. The RMSD time profiles concerning all backbone atoms of NS2B/NS3<sup>pro</sup> and the molecules (EGC, EGCG, and AcEGCG). The RMSF plot corresponds to the protein/molecules complex, and the replicates are specified.



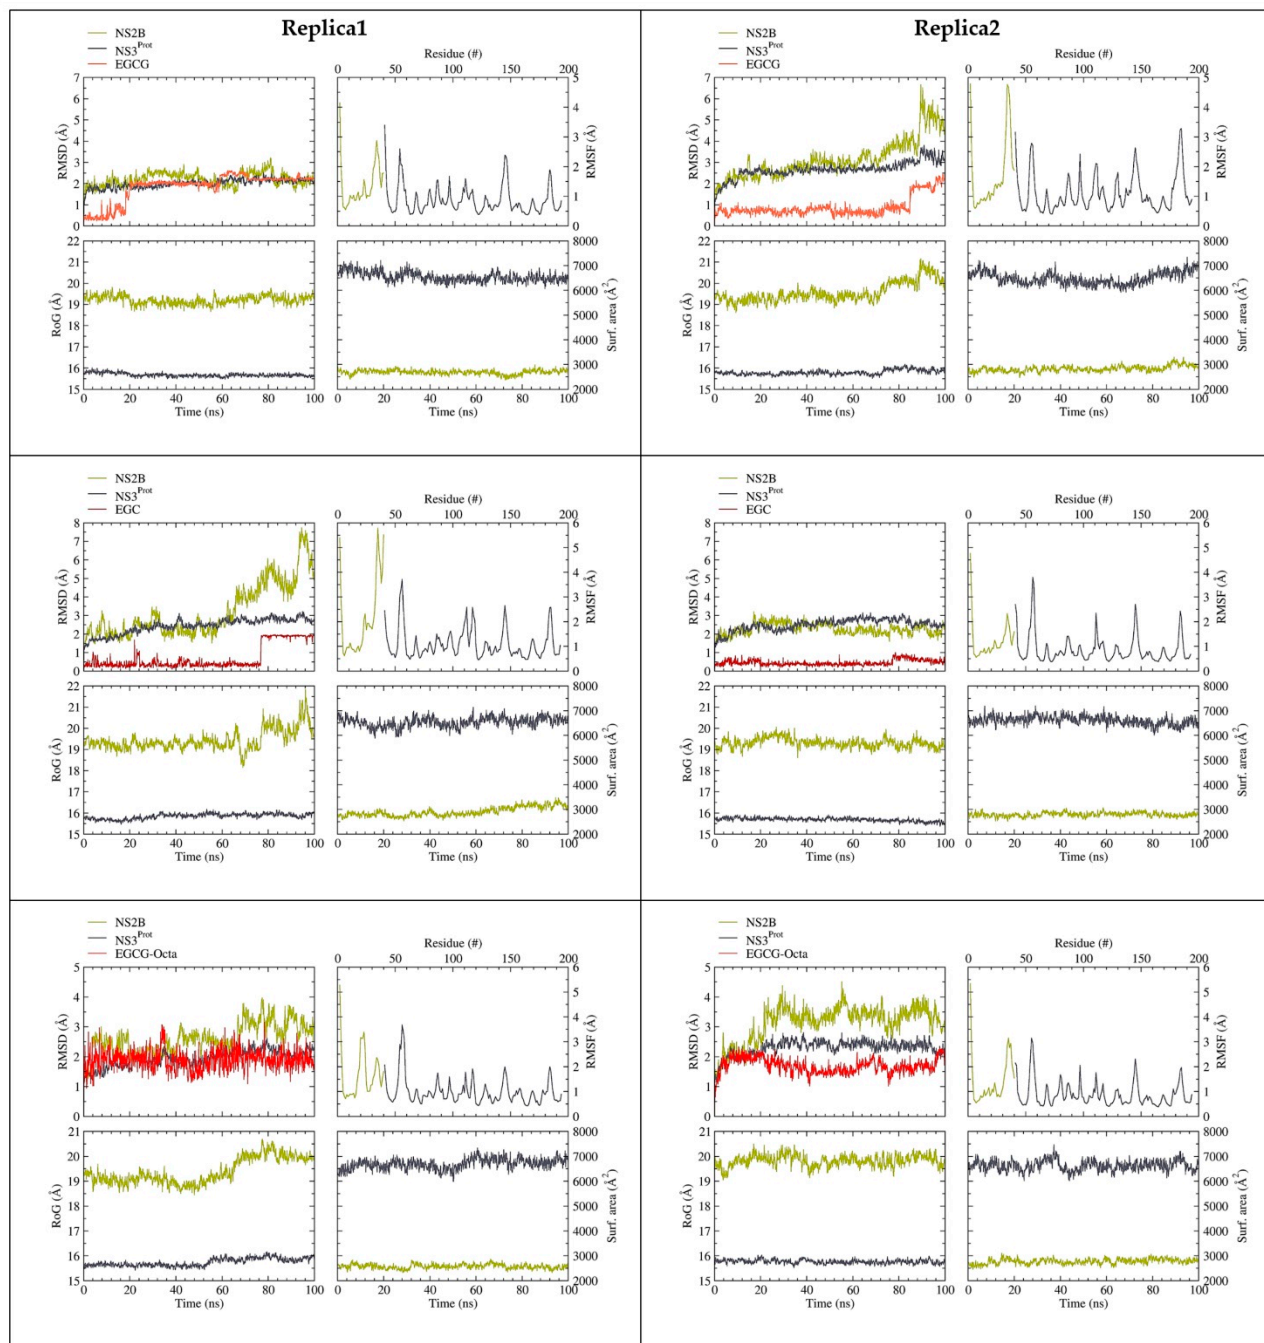

**Figure S9.** RMSD values and RMSF profiles for the replicate 100 ns of MD simulations of NS2B/NS3 protease of YFV in complex with the epigallocatechin molecules. The RMSD time profiles concerning all backbone atoms of NS2B/NS3<sup>pro</sup> and the molecules (EGC, EGCG, and AcEGCG). The RMSF plot corresponds to the protein/molecules complex, and the replicates are specified.

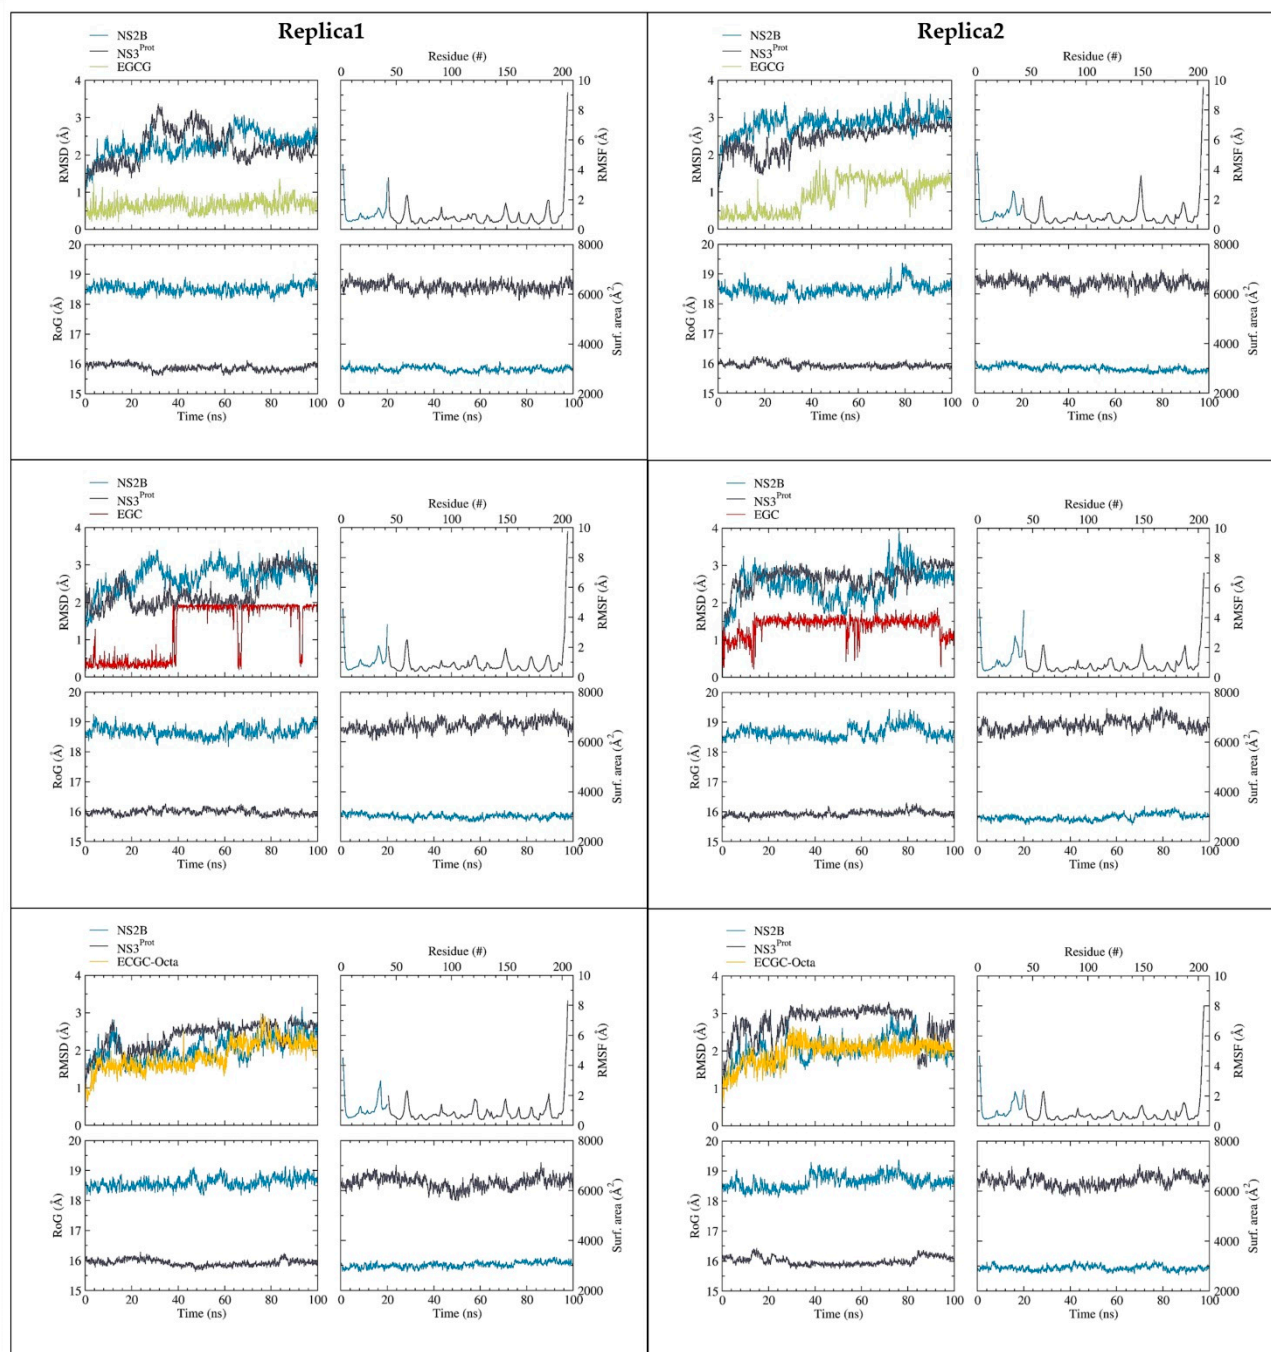

**Figure S10.** RMSD values and RMSF profiles for the replicate 100 ns of MD simulations of NS2B/NS3 protease of WNV in complex with the epigallocatechin molecules. The RMSD time profiles concerning all backbone atoms of NS2B/NS3<sup>prote</sup> and the molecules (EGC, EGCG, and AcEGCG). The RMSF plot corresponds to the protein/molecules complex, and the replicates are specified.

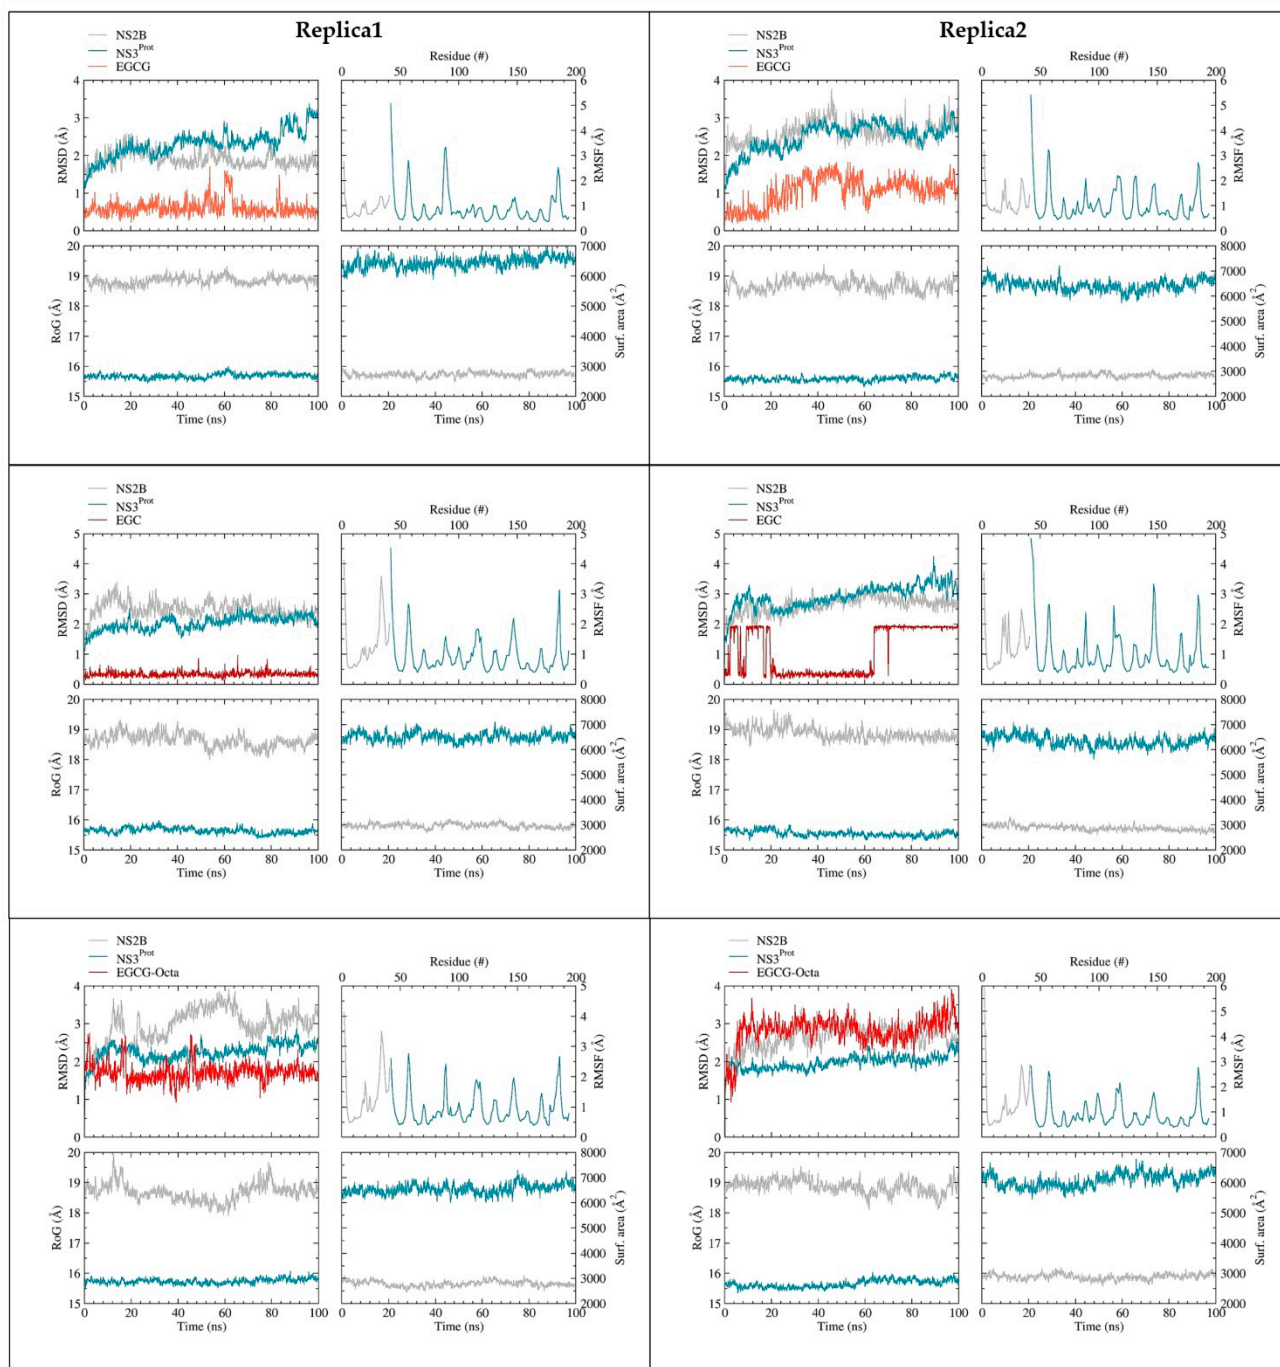

**Figure S11.** RMSD values and RMSF profiles for the replicate 100 ns of MD simulations of NS2B/NS3 protease of ZIKV in complex with the epigallocatechin molecules. The RMSD time profiles concerning all backbone atoms of NS2B/NS3<sup>prox</sup> and the molecules (EGC, EGCG, and AcEGCG). The RMSF plot corresponds to the protein/molecules complex, and the replicates are specified.



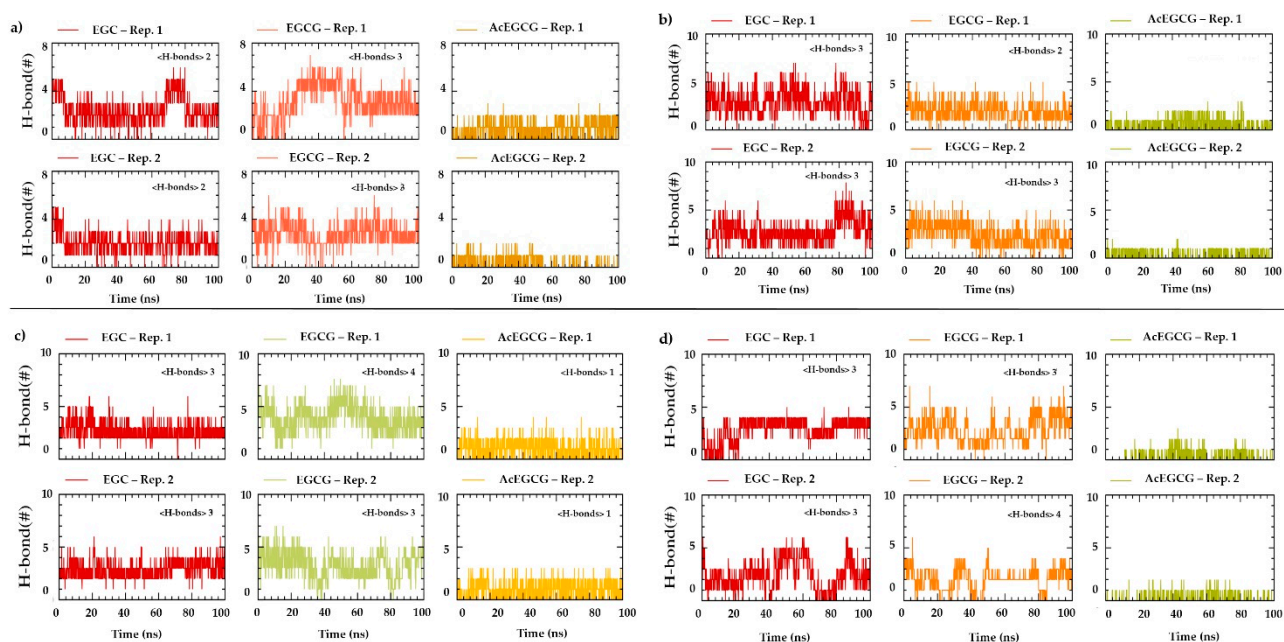

**Figure S12.** Numbers of H-bonds between the epigallocatechins and NS2B/NS3pro residues during the 100 ns MD simulations. The general criteria to determine the occurrence of the H-bond was a donor-receptor distance  $\leq 3.5$  Å and a donor-H-acceptor angle  $\geq 120^\circ$ . <H-bonds> represents the average number of intermolecular H-bonds formed along each trajectory. a) Dengue, b) YFV, c) WNV, and d) ZIKV.
